# Supplementary material for: Targeting of the NOX1/ADAM17 Enzymatic Complex Regulates Soluble MCAM-Dependent Pro-Tumorigenic Activity in Colorectal Cancer
Source: MDPI journal article supplement (doi:10.3390/biomedicines11123185), 2023-11-30
Supplement: s1 [file s1]

## **Supplementary Figures legend**

### **Supplementary Figure S1: ADAM17 pharmacological inhibition does not change lymphocyte content in MC38 tumors**

(A-D) CD4<sup>+</sup> (A), CD8<sup>+</sup> (B) T lymphocytes, B lymphocytes (CD3<sup>+</sup>/B220<sup>+</sup>) (C), and Natural killer T lymphocytes (CD3<sup>+</sup>/NK1.1<sup>+</sup>) (D) of MC38 tumors were analyzed by flow cytometry for the corresponding treated groups. (E) Tumor pan macrophages (CD45<sup>+</sup>/CD11b<sup>+</sup>/F4/80<sup>+</sup>) (left) and tumor-associated macrophages (TAM) (CD45<sup>+</sup>/CD11b<sup>+</sup>/CD68<sup>+</sup>/F4/80<sup>+</sup>) (right) in MC38 tumors were analyzed by flow cytometry for the corresponding treated groups.

### **Supplementary Figure S2: Expression of *NOX1*, *ADAM17*, and *MCAM* in CRC correlates with shorter relapse-free survival, advanced tumor stage, and *KRAS* mutations**

(A-B) Kaplan–Meier survival analysis of the index of *NOX1* (A), and *ADAM17* (B) mRNA expression (high [red] vs. low [blue]) relative to the median value in CRC patient tumor samples. (C) Expression of *NOX1* (left), *ADAM17* (middle), and *MCAM* (right) mRNA in CRC patient tumor samples according to tumor stages (1 to 4). (D) Expression of *NOX1* (left), *ADAM17* (middle), and *MCAM* (right) in *KRAS* mutated and wild-type patients from CRC patients.

### **Supplementary Figure S3: Characterization of MCAM expression on Human Dermal Lymphatic Endothelial Cells (HDLEC)**

(A) Specific mouse and human mRNA expression strategies in tumors were explored by Nanostring arrays using specific mouse and human probes. (B-D) MCAM membrane expression in HDLEC cells was analyzed by flow cytometry (B) and fluorescent microscopy (C) using a specific anti-MCAM antibody (Sendo-1) or corresponding control antibody (IgG). Fluorescence intensity of membrane MCAM expression by flow cytometry (B) and fluorescent microscopy pictures were shown (C).
